# Supplementary material for: Identification of visual cortex cell types and species differences using single-cell RNA sequencing
Source: PubMed Central journal article supplement (PMC9653448; doi:10.1038/s41467-022-34590-1), 2022-11-12
Supplement: 41467_2022_34590_MOESM2_ESM.pdf [file 41467_2022_34590_MOESM2_ESM.pdf]

## Description of Additional Supplementary Files

### **Title: Supplementary Data 1**

Description: The differential expression genes between the *HPCAL 1+* L2/3 IT and Exc *NPY* subclasses.

### **Title: Supplementary Data 2**

Description: KEGG enrichment analysis of the Exc *NPY* up-regulated differential expression genes. *P*-value for each term was determined by Fisher's exact test implemented in g:Profiler with FDR-adjust for multiple comparisons.

### **Title: Supplementary Data 3**

Description: Statistics of electrophysiological properties between *HPCAL 1+* L2/3 IT and Exc *NPY*. The significance of differences between *HPCAL 1+* L2/3 IT and Exc *NPY* was determined using two-sided Mann-Whitney test.

### **Title: Supplementary Data 4**

Description: The differential expression genes between the L4 *RORB OSTN* and IT Even subclasses.

### **Title: Supplementary Data 5**

Description: KEGG enrichment analysis of the L4 *RORB OSTN* up-regulated differential expression genes. *P*-value for each term was determined by Fisher's exact test implemented in g:Profiler with FDR-adjust for multiple comparisons.

### **Title: Supplementary Data 6**

Description: Biological Process enrichment analysis of the L4 *RORB OSTN* up-regulated differential expression genes. *P*-value for each term was determined by Fisher's exact test implemented in g:Profiler with FDR-adjust for multiple comparisons.

### **Title: Supplementary Data 7**

Description: KEGG enrichment analysis of the L4 *RORB OSTN* down-regulated differential expression genes. *P*-value for each term was determined by Fisher's exact test implemented in g:Profiler with FDR-adjust for multiple comparisons.

### **Title: Supplementary Data 8**

Description: Biological Process enrichment analysis of the L4 *RORB OSTN* down-regulated differential expression genes. *P*-value for each term was determined by Fisher's exact test implemented in g:Profiler with FDR-adjust for multiple comparisons.
